# Supplementary material for: Comparison of indoor contact time data in Zambia and Western Cape, South Africa suggests targeting of interventions to reduce Mycobacterium tuberculosis transmission should be informed by local data
Source: PubMed Central journal article supplement (PMC4746903; doi:10.1186/s12879-016-1406-5), 2016-02-09
Supplement: 12879_2016_1406_MOESM1_ESM.pdf [file 12879_2016_1406_MOESM1_ESM.pdf]

|                  | <b>Western Cape</b> | <b>Zambia</b> | <b>Total</b> |
|------------------|---------------------|---------------|--------------|
| <b>Sunday</b>    | 195 (15.4%)         | 368 (19.0%)   | 563 (17.5%)  |
| <b>Monday</b>    | 271 (21.3%)         | 347 (17.9%)   | 618 (19.2%)  |
| <b>Tuesday</b>   | 281 (22.1%)         | 349 (18.0%)   | 630 (19.6%)  |
| <b>Wednesday</b> | 278 (21.9%)         | 307 (15.8%)   | 585 (18.2%)  |
| <b>Thursday</b>  | 241 (19.0%)         | 375 (19.3%)   | 616 (19.2%)  |
| <b>Friday</b>    | 4 (0.3%)            | 99 (5.1%)     | 103 (3.2%)   |
| <b>Saturday</b>  | 0 (0.0%)            | 96 (4.9%)     | 96 (3.0%)    |

**Table S1: Day of week that data were collected for, by site**

|                                                                           |                     | <b>Western Cape</b>   | <b>Zambia</b>         | <b>p-value</b> |
|---------------------------------------------------------------------------|---------------------|-----------------------|-----------------------|----------------|
| <b>Mean number of adults/youths present per visit to: (Low estimate)</b>  | <b>Other homes</b>  | 1.55 (0.96 - 2.14)    | 2.65 (2.00 - 3.30)    | <b>0.02</b>    |
|                                                                           | <b>Shops</b>        | 10.43 (8.09 - 12.78)  | 5.07 (3.89 - 6.25)    | <b>0.0001</b>  |
|                                                                           | <b>Churches</b>     | 18.51 (16.95 - 20.07) | 16.58 (15.50 - 17.67) | <b>0.05</b>    |
|                                                                           | <b>Bars</b>         | 13.50 (11.07 - 15.92) | 15.17 (13.77 - 16.56) |                |
|                                                                           | <b>Schools</b>      | 16.80 (14.41 - 19.20) | 17.17 (15.09 - 19.24) | 0.8            |
|                                                                           | <b>Clinics</b>      | 18.33 (15.70 - 20.96) | 15.89 (14.16 - 17.63) | 0.1            |
|                                                                           | <b>Hairdressers</b> | 1.93 (-0.23 - 4.09)   | 4.91 (2.53 - 7.28)    | 0.07           |
|                                                                           | <b>Work</b>         | 9.36 (8.12 - 10.61)   | 10.16 (8.21 - 12.10)  | 0.5            |
|                                                                           | <b>Other</b>        | 11.78 (8.42 - 15.14)  | 8.65 (7.17 - 10.14)   | 0.09           |
| <b>Mean number of adults/youths present per visit to: (High estimate)</b> | <b>Other homes</b>  | 6.82 (5.72 - 7.93)    | 9.00 (7.63 - 10.37)   | <b>0.02</b>    |
|                                                                           | <b>Shops</b>        | 25.22 (19.54 - 30.89) | 13.08 (10.57 - 15.60) | <b>0.0002</b>  |
|                                                                           | <b>Churches</b>     | 43.20 (38.94 - 47.46) | 38.83 (36.19 - 41.47) | 0.09           |
|                                                                           | <b>Bars</b>         | 30.49 (24.32 - 36.66) | 34.47 (31.02 - 37.91) |                |
|                                                                           | <b>Schools</b>      | 39.36 (33.45 - 45.27) | 40.12 (34.93 - 45.32) | 0.8            |
|                                                                           | <b>Clinics</b>      | 42.99 (36.15 - 49.84) | 36.86 (32.38 - 41.34) | 0.1            |
|                                                                           | <b>Hairdressers</b> | 5.93 (3.77 - 8.09)    | 12.21 (7.01 - 17.42)  | <b>0.03</b>    |
|                                                                           | <b>Work</b>         | 21.99 (19.27 - 24.70) | 23.15 (18.78 - 27.53) | 0.7            |
|                                                                           | <b>Other</b>        | 27.78 (19.85 - 35.72) | 20.61 (17.10 - 24.13) | 0.1            |
| <b>Mean number of children present per visit to: (Low estimate)</b>       | <b>Other homes</b>  | 0.55 (0.19 - 0.91)    | 0.75 (0.35 - 1.16)    | 0.5            |
|                                                                           | <b>Shops</b>        | 5.11 (3.09 - 7.13)    | 2.14 (1.33 - 2.94)    | <b>0.01</b>    |
|                                                                           | <b>Churches</b>     | 12.56 (8.36 - 16.76)  | 11.88 (10.18 - 13.58) | 0.8            |

|                                                                     |                     |                       |                       |             |
|---------------------------------------------------------------------|---------------------|-----------------------|-----------------------|-------------|
|                                                                     | <b>Bars</b>         | 0.92 (-0.25 - 2.09)   | 1.28 (0.72 - 1.85)    |             |
|                                                                     | <b>Schools</b>      | 1.43 (0.13 - 2.74)    | 4.69 (2.39 - 6.98)    | <b>0.02</b> |
|                                                                     | <b>Clinics</b>      | 12.64 (8.67 - 16.62)  | 10.52 (7.83 - 13.21)  | 0.4         |
|                                                                     | <b>Hairdressers</b> | 0.00*                 | 1.47 (0.23 - 2.72)    | -           |
|                                                                     | <b>Work</b>         | 1.80 (0.97 - 2.63)    | 2.38 (1.19 - 3.56)    | 0.4         |
|                                                                     | <b>Other</b>        | 2.11 (0.17 - 4.05)    | 4.12 (2.49 - 5.76)    | 0.1         |
| <b>Mean number of children present per visit to: (Low estimate)</b> | <b>Other homes</b>  | 5.38 (4.68 - 6.08)    | 5.82 (4.97 - 6.68)    | 0.4         |
|                                                                     | <b>Shops</b>        | 13.74 (9.41 - 18.06)  | 7.95 (6.35 - 9.56)    | <b>0.01</b> |
|                                                                     | <b>Churches</b>     | 28.46 (17.87 - 39.04) | 28.59 (24.72 - 32.47) | 1.0         |
|                                                                     | <b>Bars</b>         | 5.58 (3.35 - 7.80)    | 6.24 (5.15 - 7.34)    |             |
|                                                                     | <b>Schools</b>      | 6.95 (4.17 - 9.72)    | 14.24 (9.25 - 19.24)  | <b>0.01</b> |
|                                                                     | <b>Clinics</b>      | 29.77 (20.96 - 38.59) | 25.12 (19.01 - 31.23) | 0.4         |
|                                                                     | <b>Hairdressers</b> | 4.00*                 | 5.86 (3.98 - 7.74)    | 0.05        |
|                                                                     | <b>Work</b>         | 7.73 (5.97 - 9.49)    | 8.34 (5.86 - 10.83)   | 0.7         |
|                                                                     | <b>Other</b>        | 8.35 (4.10 - 12.60)   | 12.14 (8.53 - 15.75)  | 0.2         |

**Table S2: Mean number of adults and youths (>12 years) and children (5-12 years) present in building by building type and site.** Low and High estimates assume that the number of adults/youths and children in buildings were equal to category lower bounds and upper bounds (see methods for details). p-values in bold indicate significance at the 95% level. \*Confidence intervals could not be calculated due to low numbers. Estimates for bars in Western Cape are considered to be unreliable (see discussion), and therefore p-values are not shown.

|                                                                                                       |                     | Western Cape          | Zambia                | p-value      |
|-------------------------------------------------------------------------------------------------------|---------------------|-----------------------|-----------------------|--------------|
| <b>Mean number of<br/>adult/youth contact<br/>hours per adult per day<br/>in:<br/>(Low estimate)</b>  | <b>Other homes</b>  | 1.38 (0.60 - 2.15)    | 1.67 (0.85 - 2.49)    | 0.6          |
|                                                                                                       | <b>Shops</b>        | 1.78 (0.71 - 2.85)    | 1.67 (0.86 - 2.47)    | 0.9          |
|                                                                                                       | <b>Churches</b>     | 2.55 (1.33 - 3.78)    | 5.94 (4.23 - 7.65)    | <b>0.002</b> |
|                                                                                                       | <b>Bars</b>         | 1.35 (0.47 - 2.22)    | 3.69 (2.59 - 4.78)    |              |
|                                                                                                       | <b>Schools</b>      | 3.29 (2.13 - 4.45)    | 3.58 (2.46 - 4.69)    | 0.7          |
|                                                                                                       | <b>Clinics</b>      | 1.04 (0.50 - 1.58)    | 1.15 (0.65 - 1.65)    | 0.8          |
|                                                                                                       | <b>Hairdressers</b> | 0.09 (0.00 - 0.21)    | 0.28 (0.02 - 0.53)    | 0.2          |
|                                                                                                       | <b>Work</b>         | 10.08 (7.23 - 12.93)  | 5.42 (3.57 - 7.27)    | <b>0.01</b>  |
|                                                                                                       | <b>Other</b>        | 1.43 (0.40 - 2.46)    | 1.96 (1.08 - 2.83)    | 0.4          |
|                                                                                                       | <b>Total</b>        | 22.96 (18.85 - 27.07) | 25.29 (21.64 - 28.95) | 0.4          |
| <b>Mean number of<br/>adult/youth contact<br/>hours per adult per day<br/>in:<br/>(High estimate)</b> | <b>Other homes</b>  | 6.05 (3.98 - 8.12)    | 5.15 (3.03 - 7.27)    | 0.5          |
|                                                                                                       | <b>Shops</b>        | 4.22 (1.69 - 6.75)    | 3.97 (2.11 - 5.83)    | 0.9          |
|                                                                                                       | <b>Churches</b>     | 5.95 (3.07 - 8.84)    | 13.90 (9.87 - 17.94)  | <b>0.002</b> |
|                                                                                                       | <b>Bars</b>         | 3.09 (1.03 - 5.15)    | 8.44 (5.90 - 10.97)   |              |
|                                                                                                       | <b>Schools</b>      | 7.76 (5.03 - 10.49)   | 8.39 (5.75 - 11.04)   | 0.7          |
|                                                                                                       | <b>Clinics</b>      | 2.43 (1.16 - 3.71)    | 2.68 (1.50 - 3.86)    | 0.8          |
|                                                                                                       | <b>Hairdressers</b> | 0.19 (0.00 - 0.42)    | 0.61 (0.07 - 1.16)    | 0.2          |
|                                                                                                       | <b>Work</b>         | 23.86 (17.35 - 30.36) | 12.35 (8.15 - 16.55)  | <b>0.004</b> |
|                                                                                                       | <b>Other</b>        | 3.34 (0.91 - 5.76)    | 4.60 (2.49 - 6.71)    | 0.4          |
|                                                                                                       | <b>Total</b>        | 56.82 (47.21 - 66.44) | 59.99 (51.43 - 68.55) | 0.6          |
|                                                                                                       | <b>Other homes</b>  | 0.61 (0.14 - 1.09)    | 0.40 (0.20 - 0.61)    | 0.4          |
|                                                                                                       | <b>Shops</b>        | 0.91 (0.31 - 1.50)    | 0.64 (0.32 - 0.96)    | 0.4          |

|                                                                                 |                       |                           |                      |              |
|---------------------------------------------------------------------------------|-----------------------|---------------------------|----------------------|--------------|
| <b>Mean number of child contact hours per adult per day in: (Low estimate)</b>  | <b>Churches</b>       | 1.72 (0.68 - 2.76)        | 4.19 (2.84 - 5.54)   | <b>0.005</b> |
|                                                                                 | <b>Bars</b>           | <i>0.04 (0.00 - 0.10)</i> | 0.21 (0.09 - 0.32)   |              |
|                                                                                 | <b>Schools</b>        | 0.03 (0.00 - 0.08)        | 0.86 (0.24 - 1.48)   | <b>0.01</b>  |
|                                                                                 | <b>Clinics</b>        | 0.70 (0.24 - 1.17)        | 0.76 (0.33 - 1.18)   | 0.9          |
|                                                                                 | <b>Hairdressers</b>   | 0.00 (0.00 - 0.00)        | 0.13 (0.00 - 0.29)   | 0.1          |
|                                                                                 | <b>Work</b>           | 2.02 (0.98 - 3.06)        | 1.01 (0.39 - 1.62)   | 0.1          |
|                                                                                 | <b>Other</b>          | 0.18 (0.02 - 0.33)        | 0.94 (0.28 - 1.59)   | <b>0.03</b>  |
|                                                                                 | <b>Total</b>          | 6.20 (4.60 - 7.80)        | 9.06 (6.99 - 11.13)  | <b>0.03</b>  |
| <b>Mean number of child contact hours per adult per day in: (High estimate)</b> | <b>Other homes</b>    | 5.06 (3.40 - 6.71)        | 2.79 (1.75 - 3.83)   | <b>0.02</b>  |
|                                                                                 | <b>Shops</b>          | 2.20 (0.79 - 3.61)        | 1.84 (1.08 - 2.59)   | 0.7          |
|                                                                                 | <b>Churches</b>       | 3.91 (1.44 - 6.39)        | 10.06 (6.81 - 13.31) | <b>0.004</b> |
|                                                                                 | <b>Bars</b>           | <i>0.40 (0.18 - 0.62)</i> | 1.16 (0.78 - 1.54)   |              |
|                                                                                 | <b>Schools</b>        | 0.74 (0.50 - 0.99)        | 2.59 (1.12 - 4.06)   | <b>0.02</b>  |
|                                                                                 | <b>Clinics</b>        | 1.65 (0.56 - 2.73)        | 1.82 (0.81 - 2.82)   | 0.8          |
|                                                                                 | <b>Hairdressers</b>   | 0.11 (0.00 - 0.21)        | 0.33 (0.00 - 0.66)   | 0.2          |
|                                                                                 | <b>Work</b>           | 8.62 (6.04 - 11.21)       | 3.50 (1.98 - 5.02)   | <b>0.001</b> |
| <b>Other</b>                                                                    | 0.92 (0.45 - 1.39)    | 2.56 (0.90 - 4.21)        | 0.1                  |              |
| <b>Total</b>                                                                    | 23.55 (19.50 - 27.59) | 26.41 (21.42 - 31.40)     | 0.4                  |              |

**Table S3: Mean number of adult and youth (>12 years) and child (5-12 years) contact hours per adult per day by building type and site.** Low and High estimates assume that the number of adult/youths and children in buildings were equal to category lower bounds and upper bounds (see methods for details). p-values in bold indicate significance at the 95% level. Estimates for bars in Western Cape are considered to be unreliable (see discussion), and therefore p-values are not shown.

|                                                                                    | Default weights          |                          |         | Alternative weights      |                          |                   |
|------------------------------------------------------------------------------------|--------------------------|--------------------------|---------|--------------------------|--------------------------|-------------------|
|                                                                                    | Western Cape             | Zambia                   | p-value | Western Cape             | Zambia                   | p-value           |
| <b>Proportion of respondents who visited a church the day before the interview</b> | 5.2%<br>(3.3% - 8.1%)    | 11.9%<br>(9.3% - 15.2%)  | 0.001   | 3.6%<br>(2.3% - 5.6%)    | 10.2%<br>(8.0% - 13.1%)  | <b>&lt;0.0001</b> |
| <b>Mean visit duration (hours)</b>                                                 | 2.68<br>(2.31 - 3.04)    | 2.75<br>(2.47 - 3.02)    | 0.8     | 2.74<br>(2.34 - 3.15)    | 2.74<br>(2.45 - 3.02)    | 0.98              |
| <b>Mean number of adults/youths present per visit</b>                              | 26.60<br>(24.47 - 28.73) | 23.98<br>(22.50 - 25.46) | 0.05    | 27.00<br>(25.17 - 28.83) | 22.97<br>(21.43 - 24.51) | <b>0.001</b>      |
| <b>Mean number of children present per visit</b>                                   | 18.25<br>(12.36 - 24.15) | 17.60<br>(15.30 - 19.89) | 0.8     | 18.28<br>(12.47 - 24.09) | 15.80<br>(13.49 - 18.11) | 0.43              |
| <b>Mean adult/youth contact hours per adult per day</b>                            | 3.67<br>(1.91 - 5.43)    | 8.57<br>(6.12 - 11.02)   | 0.002   | 2.65<br>(1.35 - 3.95)    | 7.03<br>(5.06 - 8.99)    | <b>0.0004</b>     |
| <b>Mean child contact hours per adult per day</b>                                  | 2.49<br>(1.00 - 3.98)    | 6.16<br>(4.21 - 8.12)    | 0.004   | 1.68<br>(0.67 - 2.69)    | 4.82<br>(3.28 - 6.35)    | <b>0.001</b>      |

**Table S4: Effect of using alternative weighting system on estimates for church visits, by site.** The default weighting scheme weights observations according to whether the respondent was asked about building visits on a weekday or a weekend. The alternative weighting scheme weights observations according to whether the respondent was asked about building visits on a Sunday or on any other day of the week.

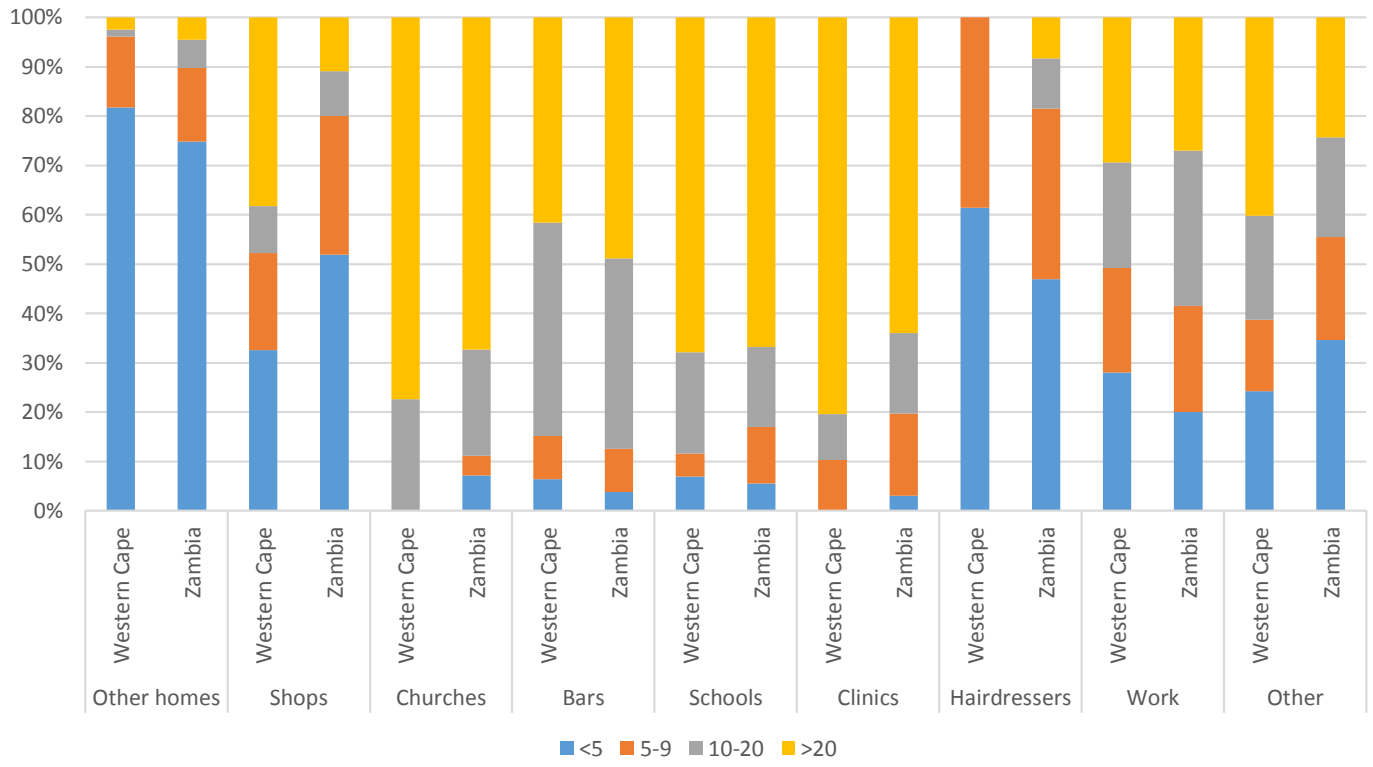

**Figure S1. Distribution of reported numbers of adults/youths in building per visit, by building type and site**

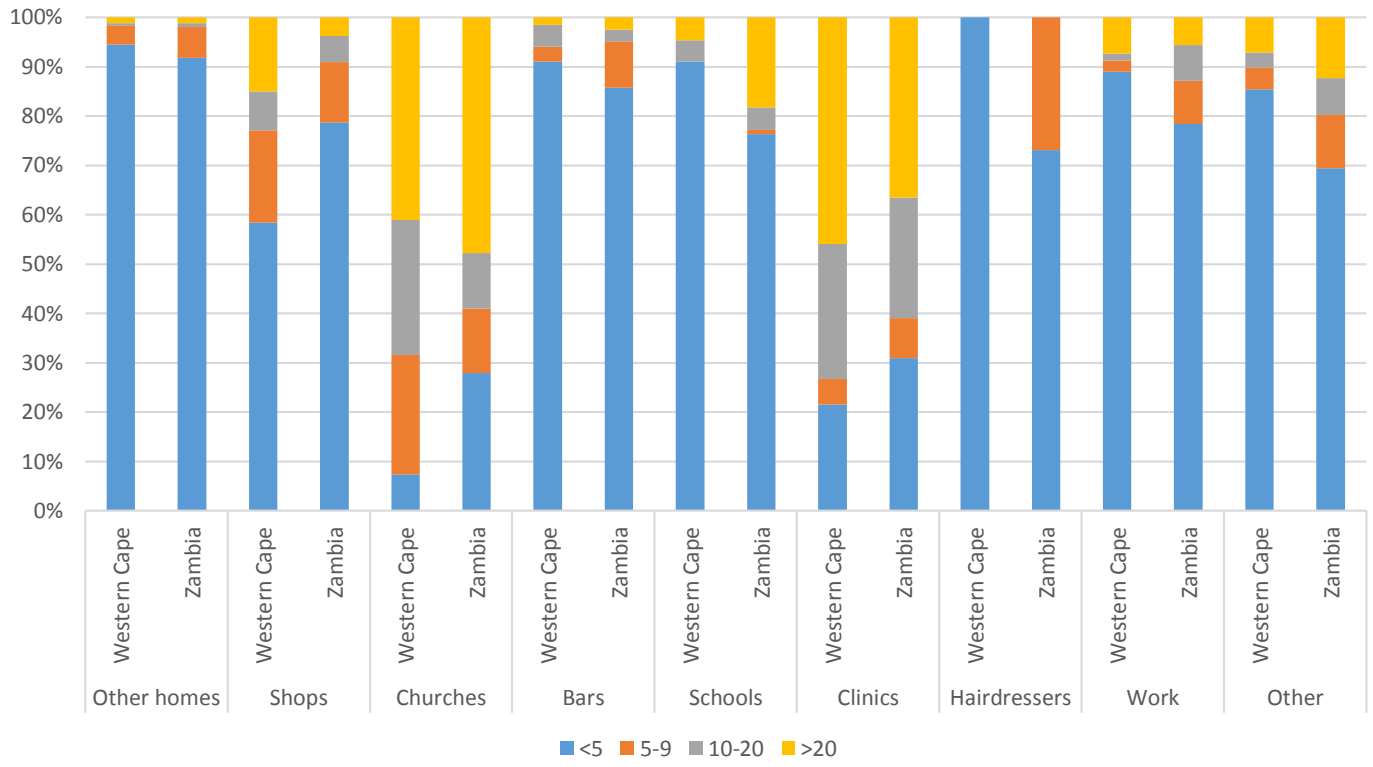

**Figure S2. Distribution of reported numbers of children (aged 5-12 years) in building per visit, by building type and site**



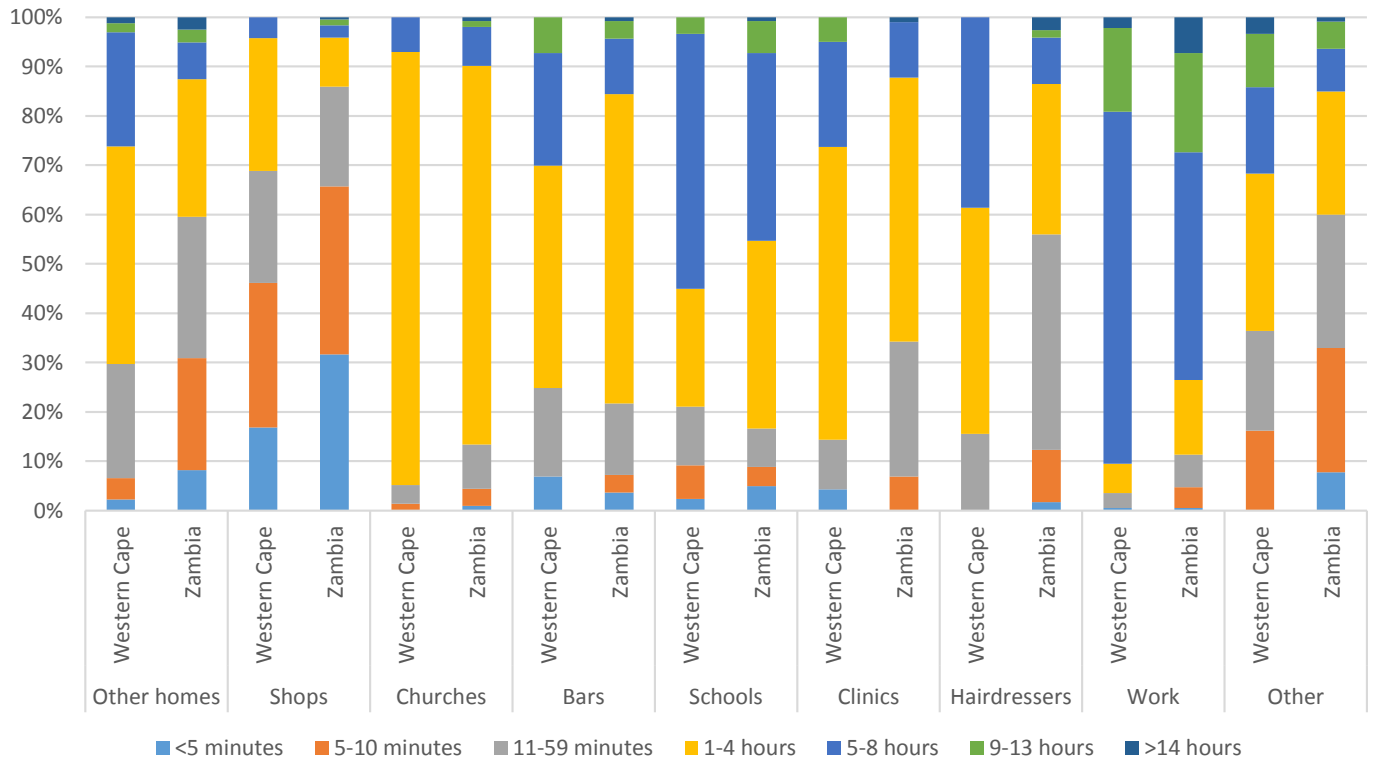

**Figure S3. Distribution of reported time spent in building per visit, by building type and site**
